# Supplementary material for: A Distinct Arabidopsis Latent Virus 1 Isolate Was Found in Wild Brassica hirta Plants and Bees, Suggesting the Potential Involvement of Pollinators in Virus Spread
Source: MDPI journal article supplement (doi:10.3390/plants13050671), 2024-02-28
Supplement: s1 [file s1]

**Supplementary Table S1.** Wild bee sampling conducted between February and May 2021  
at five shrubland sites in the Judean foothills, central Israel.

| Site name | Coordinates      | Survey's dates (*wild bee sampling <sup>An/Eu/Hyl</sup> )                                                                                                                                                      |
|-----------|------------------|----------------------------------------------------------------------------------------------------------------------------------------------------------------------------------------------------------------|
| Agur      | 31.6937, 34.9182 | 21/2 <sup>An</sup> , 28/2 <sup>An</sup> , 1st (7/3) <sup>An</sup> , 2nd (14/3) <sup>An</sup> , 3rd (21+23/3) <sup>Eu</sup> , 4th (1/4) <sup>An</sup> , 5th (14/4) <sup>An</sup> , 6th (28/4) <sup>An,Hyl</sup> |
| Lachish   | 31.5913, 34.837  | 1st (8/3) <sup>An,Eu</sup> , 2nd (15/3) <sup>An,Eu</sup> , 3rd (22/3) <sup>An,Eu</sup> , 4th (4/4) <sup>Eu</sup> , 5th (13/4) <sup>An</sup> , 6th (22/4) <sup>An,Hyl</sup> , 7th (12/5) <sup>Hyl</sup>         |
| Luzit     | 31.6793, 34.8887 | 1st (9/3) <sup>Eu</sup> , 2nd (16/3) <sup>An, Eu</sup> , 3rd (31/3) <sup>Eu</sup> , 4th (5/4) <sup>An, Eu</sup> , 5th (20/4) <sup>Eu</sup> , 6th (29/4) <sup>Eu,Hyl</sup> , 7th (5/5)                          |
| Galon     | 31.6305, 34.8437 | 1st (10/3) <sup>An</sup> , 2nd (17/3) <sup>Eu An</sup> , 3rd (25/3) <sup>An, Eu</sup> , 4th (7/4) <sup>An</sup> , 5th (25/4) <sup>An,Hyl</sup> , 6th (2/5) <sup>Hyl</sup> , 7th (6/5) <sup>Hyl</sup>           |
| Tarum     | 31.7975, 34.965  | 1st (11/3) <sup>An</sup> , 2nd (18/3) <sup>An</sup> , 3rd (30/3) <sup>An</sup> , 4th (8/4) <sup>An</sup> , 5th (23/4), 6th (3/5), 7th (11/5)                                                                   |

\*An, solitary mining bees (*Andrena*); Eu, long-horned bees (*Eucera*); Hyl, masked bees (*Hylaeus*)

*Apis mellifera* was sampled on each of the collection days.
